# Supplementary material
Source: publisher figshare collection journal article supplement (https://acs.figshare.com/ndownloader/files/4708540)

Table S1. Quantum yields of compounds **1**, **2**, and their Eu<sup>3+</sup>-only analogue. Sample letters A and B indicate two independently synthesized sample of each compound. Average quantum yields are: Eu<sup>3+</sup> = 22.5%, Tb<sup>3+</sup> = 31.6%, Eu<sup>3+</sup>/Tb<sup>3+</sup> = 38.5%.

| Ln <sup>3+</sup> | Sample | Wavelength (nm) | Φ (%) |
|------------------|--------|-----------------|-------|
| Eu               | A      | 313             | 24.8  |
| Eu               | B      | 313             | 22.6  |
| Eu               | A      | 340             | 22.8  |
| Eu               | B      | 340             | 19.7  |
| Tb               | A      | 313             | 36.8  |
| Tb               | B      | 313             | 36.1  |
| Tb               | A      | 340             | 33.7  |
| Tb               | B      | 340             | 20.8  |
| Eu/Tb            | A      | 313             | 36.4  |
| Eu/Tb            | B      | 313             | 41.2  |
| Eu/Tb            | A      | 340             | 37.3  |
| Eu/Tb            | B      | 340             | 39.0  |

Figures S1 and S2: Excitation spectrum of Compound **1** and combined excitation/emission spectrum of Compound **1**.

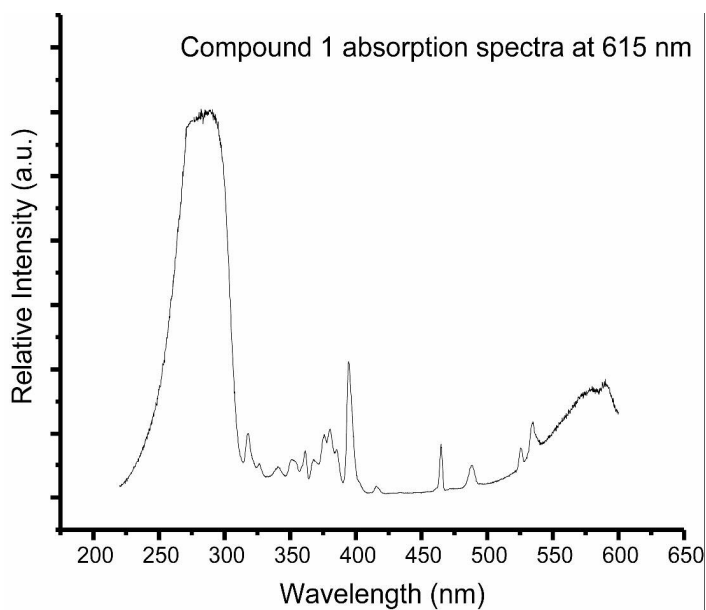

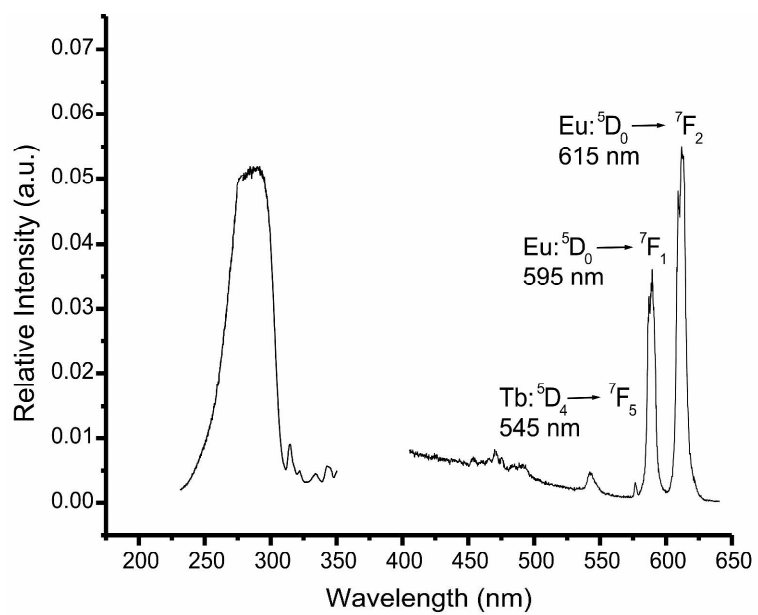

Supplement: Supplementary file 1 [file 4708540]
